# Supplementary material
Source: MDPI journal article supplement (https://www.mdpi.com/2624-8611/4/1/2)
Supplement: s1 [file s1]

*Chronic Pain Data Variable Definitions for the Single-Level Mediation Examples*

| Name                           | Definition                                       | Missing % | Scale                                              |
|--------------------------------|--------------------------------------------------|-----------|----------------------------------------------------|
| <i>ID</i>                      | Individual identifier                            | 0         | Integer index                                      |
| <i>TXGRP</i>                   | Treatment group dummy code                       | 0         | 0 = wait list control, 1 = treatment               |
| <i>MALE</i>                    | Gender dummy code                                | 0         | 0 = female, 1 = male                               |
| <i>AGE</i>                     | Age in years                                     | 0         | Numeric (19 to 78)                                 |
| <i>EDUC</i>                    | Highest education                                | 0         | 1 = Some college or less, 2 = college, 3 = Post-BA |
| <i>WORKHRS</i>                 | Work hours per week                              | 12.0      | Numeric (0 to 94)                                  |
| <i>EXERCISE</i>                | Exercise frequency                               | 1.8       | Ordinal (1 to 8)                                   |
| <i>PAIN</i>                    | Chronic pain intensity rating                    | 7.3       | 1 = no or little, 2 = moderate, 3 = severe         |
| <i>SEVPAIN</i>                 | Severe pain dummy code                           | 7.3       | 0 = no, little, moderate pain, 1 = severe pain     |
| <i>ANXIETY</i>                 | Anxiety composite                                | 5.5       | Numeric (7 to 26)                                  |
| <i>STRESS</i>                  | Stress composite                                 | 0         | Ordinal (1 to 7)                                   |
| <i>CONTROL</i>                 | Perceived control over pain composite            | 0         | Numeric (6 to 30)                                  |
| <i>DEPRESS</i>                 | Depression composite                             | 13.5      | Numeric (7 to 28)                                  |
| <i>INTERFERE</i>               | Pain interference with life composite            | 10.5      | Numeric (6 to 41)                                  |
| <i>DISABILITY</i>              | Psychosocial disability composite                | 9.1       | Numeric (10 to 34)                                 |
| Depression Questionnaire Items |                                                  |           |                                                    |
| <i>DEPRESS<sub>1</sub></i>     | Couldn't experience any positive feelings at all | 4.7       | Ordinal (1 to 4)                                   |
| <i>DEPRESS<sub>2</sub></i>     | Difficult to work up the initiative to do things | 2.2       | Ordinal (1 to 4)                                   |
| <i>DEPRESS<sub>3</sub></i>     | I felt that I had nothing to look forward to     | 1.8       | Ordinal (1 to 4)                                   |

|                             |                                              |     |                  |
|-----------------------------|----------------------------------------------|-----|------------------|
| <i>DEPRESS</i> <sub>4</sub> | I felt down-hearted and blue                 | 1.5 | Ordinal (1 to 4) |
| <i>DEPRESS</i> <sub>5</sub> | Unable to become enthusiastic about anything | 2.2 | Ordinal (1 to 4) |
| <i>DEPRESS</i> <sub>6</sub> | I felt I wasn't worth much as a person       | 4.0 | Ordinal (1 to 4) |
| <i>DEPRESS</i> <sub>7</sub> | I felt that life was meaningless             | 2.9 | Ordinal (1 to 4) |

Pain Interference Questionnaire Items

|                               |                                                   |     |                  |
|-------------------------------|---------------------------------------------------|-----|------------------|
| <i>INTERFERE</i> <sub>1</sub> | Give up enjoyable activities                      | 1.8 | Ordinal (1 to 7) |
| <i>INTERFERE</i> <sub>2</sub> | Not been able to fulfill responsibilities at home | 1.5 | Ordinal (1 to 7) |
| <i>INTERFERE</i> <sub>3</sub> | Not been able to enjoy your relationships         | 1.5 | Ordinal (1 to 7) |
| <i>INTERFERE</i> <sub>4</sub> | Not been able to pursue personal goals            | 2.5 | Ordinal (1 to 7) |
| <i>INTERFERE</i> <sub>5</sub> | Unable to provide basic care for myself           | 3.3 | Ordinal (1 to 7) |
| <i>INTERFERE</i> <sub>6</sub> | Unable to think clearly, concentrate, or remember | 0.7 | Ordinal (1 to 7) |

Psychosocial Disability Questionnaire Items

|                              |                                                   |     |                  |
|------------------------------|---------------------------------------------------|-----|------------------|
| <i>PSYDISAB</i> <sub>1</sub> | I isolate myself as much as I can from the family | 3.3 | Ordinal (1 to 6) |
| <i>PSYDISAB</i> <sub>2</sub> | I am doing fewer social activities                | 4.7 | Ordinal (1 to 6) |
| <i>PSYDISAB</i> <sub>3</sub> | I sometimes behave as if I were confused          | 3.6 | Ordinal (1 to 6) |
| <i>PSYDISAB</i> <sub>4</sub> | I laugh or cry suddenly                           | 3.6 | Ordinal (1 to 6) |
| <i>PSYDISAB</i> <sub>5</sub> | I act irritable and impatient with myself         | 4.7 | Ordinal (1 to 6) |
| <i>PSYDISAB</i> <sub>6</sub> | I do not speak clearly when I am under stress     | 3.6 | Ordinal (1 to 6) |

---
